# Supplementary material
Source: Springer Nature journal article supplement (https://www.springermedizin.de/resource/supplementary/13019_2011_519_MOESM3_ESM.pdf/9638530)

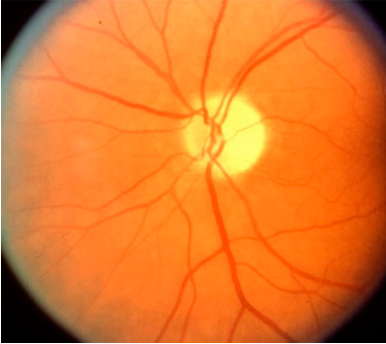

Supplement: MOESM3 [file 9638530]
